# Supplementary material
Source: publisher site journal article supplement (https://www.dovepress.com/article/372351)
Supplement: Supplementary file 1 [file get_supplementary_file.php]

**Table A1.** Sensitivity analysis of the model to predict unfavourable treatment outcome: Comparison of the regression coefficients, standard errors, and p-values for complete case analysis (CCA) and multiple imputation (MI) for generalized linear model.

| **Predictor variable*** | | **Complete case analysis** | | | | **Multiple imputation** | | | |
| --- | --- | --- | --- | --- | --- | --- | --- | --- | --- |
| Baseline  anemia (yes) | | Coef | | SE | P-value | Coef | | SE | P-value |
| 1.139 | | 0.25226 | <0.001 | 1.083 | | 0.22436 | <0.001 |
| Age (>45 years) | | 0.7687 | | 0.31423 | 0.0071 | 0.822 | | 0.30942 | 0.0081 |
| Major-adverse events (yes) | | 0.955 | | 0.31981 | <0.001 | 1.002 | | 0.28716 | <0.001 |
| Comorbidity(yes) | | 0.742 | | 0.23085 | 0.0021 | 0.712 | | 0.23083 | 0.0023 |
| Treatment supporter (no) | | 0.889 | | 0.30685 | <0.001 | 0.971 | | 0.27392 | <0.001 |
| Marital-status (unmarried) | | 0.763 | | 0.2501 | 0.0024 | 0.753 | | 0.24972 | 0.0032 |

*****Variables included in the final model, Coef= regression coefficients, SE=standard error
